# Supplementary material for: Association of Anaplasma marginale Strain Superinfection with Infection Prevalence within Tropical Regions
Source: PubMed Central journal article supplement (PMC4368111; doi:10.1371/journal.pone.0120748), 2015-03-20
Supplement: pone.0120748.s002.pdf [file pone.0120748.s002.pdf]

S2 Table: *A. marginale msp1α* genotypes present in singly and superinfected cattle in La Joya (Jalisco)

| Animal | Number of unique <i>msp1α</i> genotypes detected and sequenced <sup>a</sup> |                  |               |         |      |
|--------|-----------------------------------------------------------------------------|------------------|---------------|---------|------|
|        | 1                                                                           | 2                | 3             | 4       | 5    |
| 01A    | 12,13,13,14                                                                 |                  |               |         |      |
| 32B    | τ,57                                                                        |                  |               |         |      |
| 40N    | 12,13                                                                       |                  |               |         |      |
| 52N    | LJ2,13,18                                                                   |                  |               |         |      |
| 54N    | αβββΓΓ                                                                      |                  |               |         |      |
| 68N    | αββ15                                                                       |                  |               |         |      |
| 90N    | αββ,LJ1                                                                     |                  |               |         |      |
| 10B    | αββΓΓ                                                                       | αβββΓΓ           |               |         |      |
| 09N    | T,Q,C,N,B,C,F                                                               | EV4,C,EV8        |               |         |      |
| 02V    | LJ2,LJ2,13,18                                                               | LJ2,13,18        | 18            |         |      |
| 05A    | EV2,EV7,EV7,EV7,EV7                                                         | T,Q,C,N,B,C,EV8  | T,B,C,N,B,C,F |         |      |
| 01N    | α,EV6,β,LJ1                                                                 | EV4,62,62,EV11,9 | EV12,10,15,15 | αββ,LJ1 |      |
| 06B    | EV4,62,62,EV11,9                                                            | LJ2,LJ2,13,18    | LJ2,13,18     | αβββΓΓ  |      |
| 35B    | EV2,EV7,EV7,EV7,EV7                                                         | EV3,EV7,ββ,EV6   | LJ2,13,18     | 13,18   | τ,57 |

<sup>a</sup> The unique variable repeat sequence is designated by a letter, number, or alphanumeric combination. The sequences have been deposited in GenBank and the accession numbers are provided in S3 Table. The *msp1α* genotype is designated by the number and order of the repeats, listed 5' to 3'.
